# Supplementary material
Source: PubMed Central journal article supplement (PMC7869692)
Supplement: NIHMS1549981-supplement-1549981_ReportingSummary.pdf [file NIHMS1549981-supplement-1549981_ReportingSummary.pdf]

## Reporting Summary

Nature Research wishes to improve the reproducibility of the work that we publish. This form provides structure for consistency and transparency in reporting. For further information on Nature Research policies, see [Authors & Referees](#) and the [Editorial Policy Checklist](#).

### Statistics

For all statistical analyses, confirm that the following items are present in the figure legend, table legend, main text, or Methods section.

n/a Confirmed

- The exact sample size ( $n$ ) for each experimental group/condition, given as a discrete number and unit of measurement
- A statement on whether measurements were taken from distinct samples or whether the same sample was measured repeatedly
- The statistical test(s) used AND whether they are one- or two-sided  
*Only common tests should be described solely by name; describe more complex techniques in the Methods section.*
- A description of all covariates tested
- A description of any assumptions or corrections, such as tests of normality and adjustment for multiple comparisons
- A full description of the statistical parameters including central tendency (e.g. means) or other basic estimates (e.g. regression coefficient) AND variation (e.g. standard deviation) or associated estimates of uncertainty (e.g. confidence intervals)
- For null hypothesis testing, the test statistic (e.g.  $F$ ,  $t$ ,  $r$ ) with confidence intervals, effect sizes, degrees of freedom and  $P$  value noted  
*Give  $P$  values as exact values whenever suitable.*
- For Bayesian analysis, information on the choice of priors and Markov chain Monte Carlo settings
- For hierarchical and complex designs, identification of the appropriate level for tests and full reporting of outcomes
- Estimates of effect sizes (e.g. Cohen's  $d$ , Pearson's  $r$ ), indicating how they were calculated

*Our web collection on [statistics for biologists](#) contains articles on many of the points above.*

### Software and code

Policy information about [availability of computer code](#)

Data collection

Base calling: Illumina RTA-1.12 to 1.18 software

Data analysis

ChIA-PET Utilities v0.0.1a-r1 (code available at <https://github.com/cheehongsg/CPU>)  
ChiaSigScaled (code available at <https://github.com/cheehongsg/ChiaSigScaled>)  
PhenStat\_2.22.0 in R version 3.6.1.  
Trim Galore! v0.4.0  
Hisat v2.1.0  
HTSeq v0.6.1p1  
Gorilla <http://cbl-gorilla.cs.technion.ac.il/>  
MACS v2.1.0.20151222  
DESeq2\_1.16.1 with R version 3.4.0  
Cufflinks v2.2.1

For manuscripts utilizing custom algorithms or software that are central to the research but not yet described in published literature, software must be made available to editors/reviewers. We strongly encourage code deposition in a community repository (e.g. GitHub). See the Nature Research [guidelines for submitting code & software](#) for further information.

### Data

Policy information about [availability of data](#)

All manuscripts must include a [data availability statement](#). This statement should provide the following information, where applicable:

- Accession codes, unique identifiers, or web links for publicly available datasets
- A list of figures that have associated raw data
- A description of any restrictions on data availability

All data described in this study are deposited in NCBI's Gene Expression Omnibus GSE120393

## Field-specific reporting

Please select the one below that is the best fit for your research. If you are not sure, read the appropriate sections before making your selection.

Life sciences       Behavioural & social sciences       Ecological, evolutionary & environmental sciences

For a reference copy of the document with all sections, see [nature.com/documents/nr-reporting-summary-flat.pdf](https://www.nature.com/documents/nr-reporting-summary-flat.pdf)

## Life sciences study design

All studies must disclose on these points even when the disclosure is negative.

|                 |                                                                                                                          |
|-----------------|--------------------------------------------------------------------------------------------------------------------------|
| Sample size     | No sample size calculation was performed.                                                                                |
| Data exclusions | One replicate of KO si-chr9 F1 clones RNA-seq data was removed as the correlation was low ( $r < 0.9$ ).                 |
| Replication     | Samples were generated in replicate or triplicate when possible. Only the above data point was excluded (Data exclusion) |
| Randomization   | There was no randomization in this study                                                                                 |
| Blinding        | There was no blinding in this study.                                                                                     |

## Reporting for specific materials, systems and methods

We require information from authors about some types of materials, experimental systems and methods used in many studies. Here, indicate whether each material, system or method listed is relevant to your study. If you are not sure if a list item applies to your research, read the appropriate section before selecting a response.

### Materials & experimental systems

| n/a                                 | Involved in the study                                           |
|-------------------------------------|-----------------------------------------------------------------|
| <input type="checkbox"/>            | <input checked="" type="checkbox"/> Antibodies                  |
| <input type="checkbox"/>            | <input checked="" type="checkbox"/> Eukaryotic cell lines       |
| <input checked="" type="checkbox"/> | <input type="checkbox"/> Palaeontology                          |
| <input type="checkbox"/>            | <input checked="" type="checkbox"/> Animals and other organisms |
| <input checked="" type="checkbox"/> | <input type="checkbox"/> Human research participants            |
| <input checked="" type="checkbox"/> | <input type="checkbox"/> Clinical data                          |

### Methods

| n/a                                 | Involved in the study                           |
|-------------------------------------|-------------------------------------------------|
| <input type="checkbox"/>            | <input checked="" type="checkbox"/> ChIP-seq    |
| <input checked="" type="checkbox"/> | <input type="checkbox"/> Flow cytometry         |
| <input checked="" type="checkbox"/> | <input type="checkbox"/> MRI-based neuroimaging |

## Antibodies

|                 |                                                                                                                                                                                                                                                                                                                                                                                                                                                                                                                                                                                                                                                                                                                                                                                                                                                                             |
|-----------------|-----------------------------------------------------------------------------------------------------------------------------------------------------------------------------------------------------------------------------------------------------------------------------------------------------------------------------------------------------------------------------------------------------------------------------------------------------------------------------------------------------------------------------------------------------------------------------------------------------------------------------------------------------------------------------------------------------------------------------------------------------------------------------------------------------------------------------------------------------------------------------|
| Antibodies used | Antibodies used are anti-SUZ12 (ab12073, polyclonal, Abcam), anti-EED (ab4469, polyclonal, Abcam), EZH2 (#39875, AC22, Active Motif), H3K27me3 (ab6002, mAbcam 6002, Abcam), RNAPII (MMS126R, clone 8WG16, Covance) and CTCF (ab70303, polyclonal Abcam)                                                                                                                                                                                                                                                                                                                                                                                                                                                                                                                                                                                                                    |
| Validation      | All antibodies were commercially available. Listed below are information available<br><a href="https://www.abcam.com/suz12-antibody-chip-grade-ab12073.html">https://www.abcam.com/suz12-antibody-chip-grade-ab12073.html</a><br><a href="https://www.abcam.com/eed-antibody-ab4469.html">https://www.abcam.com/eed-antibody-ab4469.html</a><br><a href="http://www.activemotif.com/catalog/details/39875/ezh2-antibody-mab-clone-ac22">http://www.activemotif.com/catalog/details/39875/ezh2-antibody-mab-clone-ac22</a><br><a href="https://www.abcam.com/histone-h3-tri-methyl-k27-antibody-mabcam-6002-chip-grade-ab6002.html">https://www.abcam.com/histone-h3-tri-methyl-k27-antibody-mabcam-6002-chip-grade-ab6002.html</a><br><a href="https://www.abcam.com/ctcf-antibody-chip-grade-ab70303.html">https://www.abcam.com/ctcf-antibody-chip-grade-ab70303.html</a> |

## Eukaryotic cell lines

Policy information about [cell lines](#)

|                                                                      |                                                                                                                                                                                                                  |
|----------------------------------------------------------------------|------------------------------------------------------------------------------------------------------------------------------------------------------------------------------------------------------------------|
| Cell line source(s)                                                  | E14 cell line used was a courtesy from Edward Rubin Lab (Lawrence Berkeley National Lab); MEF was primary isolated expanded from mouse from the Genetic Engineering Technologies group of the Jackson Laboratory |
| Authentication                                                       | None of the cell lines used were authenticated.                                                                                                                                                                  |
| Mycoplasma contamination                                             | The cell lines were not tested for mycoplasma contamination.                                                                                                                                                     |
| Commonly misidentified lines<br>(See <a href="#">ICLAC</a> register) | No commonly misidentified lines were used.                                                                                                                                                                       |

## Animals and other organisms

Policy information about [studies involving animals](#); [ARRIVE guidelines](#) recommended for reporting animal research

|                         |                                                                                                                                                                                                                             |
|-------------------------|-----------------------------------------------------------------------------------------------------------------------------------------------------------------------------------------------------------------------------|
| Laboratory animals      | Mouse C57BL/6NJ was used.                                                                                                                                                                                                   |
| Wild animals            | This study did not involve wild animals.                                                                                                                                                                                    |
| Field-collected samples | This study did not involve samples collected from the field.                                                                                                                                                                |
| Ethics oversight        | All procedures and protocols were approved by the Jackson Laboratory Animal Care and Use Committee and were conducted in compliance with the National Institute of Health Guideline for Care and Use of Laboratory Animals. |

Note that full information on the approval of the study protocol must also be provided in the manuscript.

## ChIP-seq

### Data deposition

- Confirm that both raw and final processed data have been deposited in a public database such as [GEO](#).
- Confirm that you have deposited or provided access to graph files (e.g. BED files) for the called peaks.

Data access links  
*May remain private before publication.*

<https://www.ncbi.nlm.nih.gov/geo/query/acc.cgi?acc=GSE120393>

Files in database submission

ChIP-seq data for: RNAPII, H3K27me3, and CTCF.  
BAMs:  
RNAPolIII\_ChIP\_rep1.unique.collapse.sorted.bam  
RNAPolIII\_ChIP\_rep2.unique.collapse.sorted.bam  
RNAPolIII\_ChIP\_rep3.unique.collapse.sorted.bam  
RNAPolIII\_ChIP\_rep4.unique.collapse.sorted.bam  
RNAPolIII\_ChIP\_rep1\_input.unique.collapse.sorted.bam  
RNAPolIII\_ChIP\_rep2\_input.unique.collapse.sorted.bam  
RNAPolIII\_ChIP\_rep3\_input.unique.collapse.sorted.bam  
RNAPolIII\_ChIP\_rep4\_input.unique.collapse.sorted.bam  
H3K27me3\_ChIP\_rep1.unique.collapse.sorted.bam  
H3K27me3\_ChIP\_rep2.unique.collapse.sorted.bam  
H3K27me3\_ChIP\_rep1\_input.unique.collapse.sorted.bam  
H3K27me3\_ChIP\_rep2\_input.unique.collapse.sorted.bam  
CTCF\_ChIP\_rep1\_input.unique.collapse.sorted.bam  
CTCF\_ChIP\_rep1.unique.collapse.sorted.bam  
CTCF\_ChIP\_rep2\_input.unique.collapse.sorted.bam  
CTCF\_ChIP\_rep2.unique.collapse.sorted.bam

Peaks:  
RNAPolIII\_ChIP.narrowPeak.gz  
H3K27me3\_ChIP.broadPeak.gz  
CTCF\_ChIP.narrowPeak.gz

Signals:  
RNAPolIII\_ChIP\_foldEnrich.bigWig  
RNAPolIII\_ChIP\_treat.bigWig  
RNAPolIII\_ChIP\_input.bigWig  
CTCF\_ChIP\_foldEnrich.bigWig  
CTCF\_ChIP\_treat.bigWig  
CTCF\_ChIP\_input.bigWig  
H3K27me3\_ChIP\_foldEnrich.bigWig  
H3K27me3\_ChIP\_treat.bigWig  
H3K27me3\_ChIP\_input.bigWig

Genome browser session  
*(e.g. [UCSC](#))*

*Provide a link to an anonymized genome browser session for "Initial submission" and "Revised version" documents only, to enable peer review. Write "no longer applicable" for "Final submission" documents.*

### Methodology

Replicates

Replicates were generated for all samples.

Sequencing depth

All reads are single-end 51 bp.  
Factor Total\_reads Uniquely\_mapped\_PCRdedup  
RNA\_PolIII 43,381,959 32,741,261

|                         |                                                                                                                                                                                                                                                                                                                                                                                                                                                                                                                                                                                                                                                                 |
|-------------------------|-----------------------------------------------------------------------------------------------------------------------------------------------------------------------------------------------------------------------------------------------------------------------------------------------------------------------------------------------------------------------------------------------------------------------------------------------------------------------------------------------------------------------------------------------------------------------------------------------------------------------------------------------------------------|
|                         | <pre>H3K27me3 32,077,698 22,169,509 CTCF 66,418,692 45,777,229</pre>                                                                                                                                                                                                                                                                                                                                                                                                                                                                                                                                                                                            |
| Antibodies              | Antibodies used are H3K27me3 (ab6002, Abcam), RNAPII (MMS126R, clone 8WG16, Covance) and CTCF (ab70303, Abcam)                                                                                                                                                                                                                                                                                                                                                                                                                                                                                                                                                  |
| Peak calling parameters | <p>All factors are processed in the same manner, we provide an example for RNAPII as follows.</p> <p>Mapping:</p> <pre>bwa aln -l 25 -f RNAPolII_ChIP_rep1.sai mm10.fa RNAPolII_ChIP_rep1.fastq.gz bwa samse -f RNAPolII_ChIP_rep1.sam mm10.fa RNAPolII_ChIP_rep1.fastq.gz samtools sort -O bam -o RNAPolII_ChIP_rep1.bam RNAPolII_ChIP_rep1.sam</pre> <p>Peak calling:</p> <p>Peaks were called after merging replicates (RNAPolII_ChIP.rep*.unique.collapse.sorted.bam files), then the peak calling command was as follow.</p> <pre>macs2 callpeak --nomodel --extsize 250 -B --SPMR - RNAPolII_ChIP_treat.bam -c RNAPolII_ChIP_input.bam -f BAM -g mm</pre> |
| Data quality            | <p>All reported peaks have FDR 5%. The number of peaks:</p> <p>RNAPolII: 20591 narrow peaks<br/>H3K27me3: 4347 broad peaks<br/>CTCF: 36992 narrow peaks</p>                                                                                                                                                                                                                                                                                                                                                                                                                                                                                                     |
| Software                | <pre>bwa version 0.7.12 MACS version 2.1.1.20160309 samtools version 1.2 (merging and sorting BAM files).</pre>                                                                                                                                                                                                                                                                                                                                                                                                                                                                                                                                                 |
