# Supplementary material
Source: PubMed Central journal article supplement (PMC7869692)
Supplement: NIHMS1549981-supplement-SuppInfo.pdf [file NIHMS1549981-supplement-SuppInfo.pdf]

## Supplementary Table 2

### ChIA-PET interaction data summary

| Factor                                             | EED           |           | EZH2          |           | SUZ12         |           | PRC2 (combined) |           |
|----------------------------------------------------|---------------|-----------|---------------|-----------|---------------|-----------|-----------------|-----------|
| Number of replicates                               | 6             |           | 7             |           | 11            |           | 24              |           |
| Total reads pairs                                  | 1,575,374,571 |           | 1,034,753,420 |           | 2,507,372,657 |           | 5,117,500,648   |           |
| non-redundant, non-chimeric                        | 208,931,828   | 13%       | 97,936,086    | 9%        | 268,046,232   | 11%       | 574,914,146     | 11%       |
| Total binding peaks                                | 31,366        |           | 42,189        |           | 25,467        |           | 23,368          |           |
| Peaks with interactions                            | 10,789        | 34%       | 15,483        | 37%       | 11,678        | 46%       | 15,428          | 66%       |
| Interaction clusters                               | 146,066,534   |           | 57,294,283    |           | 200,505,313   |           | 397,500,613     |           |
| Significant cis-interactions (FDR<0.05, p<0.05)    | 63,317        | 0.04%     | 50,819        | 0.09%     | 104,822       | 0.05%     | 261,440         | 0.07%     |
| Interactions with PRC2 binding                     | 12,130        |           | 19,302        |           | 28,310        |           | 54,173          |           |
| Interactions with PRC2 binding (single anchor; SA) | 7,937         | 13%       | 10,718        | 21%       | 20,614        | 20%       | 40,544          | 16%       |
| Interactions with PRC2 binding (both anchors; BA)  | 4,193         | 7%        | 8,584         | 17%       | 7,696         | 7%        | 13,629          | 5%        |
| <b>Interaction Types</b>                           | <b>BA</b>     | <b>SA</b> | <b>BA</b>     | <b>SA</b> | <b>BA</b>     | <b>SA</b> | <b>BA</b>       | <b>SA</b> |
| Intragenic loops                                   | 1332          | 1799      | 3390          | 3033      | 2380          | 3714      | 3686            | 8925      |
|                                                    | (32%)         | (23%)     | (39%)         | (28%)     | (31%)         | (18%)     | (27%)           | (22%)     |
| promoter anchored                                  | 1915          | 3573      | 3980          | 4717      | 4305          | 11626     | 8,175           | 21,584    |
|                                                    | (46%)         | (45%)     | (46%)         | (44%)     | (56%)         | (56%)     | (60%)           | (53%)     |
| P-P                                                | 951           | 483       | 1,991         | 587       | 2,381         | 1,425     | 4,694           | 2,998     |
| P-I                                                | 593           | 1,820     | 1,248         | 2,541     | 1,060         | 5,791     | 1,800           | 10,710    |
| P-G                                                | 371           | 1,270     | 741           | 1,589     | 864           | 4,410     | 1,681           | 7,876     |
| non-promoter anchored                              | 946           | 2,565     | 1214          | 2968      | 1011          | 5274      | 1768            | 10035     |
|                                                    | (22%)         | (32%)     | (14%)         | (28%)     | (13%)         | (26%)     | (13%)           | (25%)     |
| I-I                                                | 427           | 1,184     | 669           | 1,459     | 449           | 1,875     | 737             | 4,201     |
| G-G                                                | 189           | 443       | 169           | 478       | 202           | 1,124     | 356             | 1,921     |
| G-I                                                | 330           | 938       | 376           | 1,031     | 360           | 2,275     | 675             | 3,913     |

Replicates were combined and processed for interaction callings. Interactions were further examined for binding peak support. We report interactions with both anchors (BA) and single anchor (SA) support, respectively. Data for each factor were further combined and processed as a PRC2 interactions.

## Supplementary Table 6

### Gene Ontology analysis: Top 20 enriched biological processes for PRC2 interactions-tethered genes (5825 PRC2-associated genes in relative to 24,692 non-interacting genes)

| GO term    | Description                                             | FDR<br>q-value | Enrichment (N, B, n, b)     |
|------------|---------------------------------------------------------|----------------|-----------------------------|
| GO:0032502 | developmental process                                   | 2.16E-140      | 1.65 (21172,4680,4642,1692) |
| GO:0048856 | anatomical structure development                        | 1.29E-133      | 1.80 (21172,3273,4642,1292) |
| GO:0048869 | cellular developmental process                          | 2.47E-99       | 1.75 (21172,2861,4642,1096) |
| GO:0009653 | anatomical structure morphogenesis                      | 2.35E-96       | 2.09 (21172,1463,4642,672)  |
| GO:0051239 | regulation of multicellular organismal process          | 1.96E-95       | 1.74 (21172,2815,4642,1073) |
| GO:0048731 | system development                                      | 6.42E-94       | 2.55 (21172,771,4642,431)   |
| GO:0007275 | multicellular organism development                      | 9.33E-94       | 2.10 (21172,1402,4642,647)  |
| GO:0050793 | regulation of developmental process                     | 1.55E-91       | 1.79 (21172,2449,4642,959)  |
| GO:0030154 | cell differentiation                                    | 4.62E-86       | 1.83 (21172,2108,4642,847)  |
| GO:2000026 | regulation of multicellular organismal development      | 1.11E-82       | 1.87 (21172,1891,4642,775)  |
| GO:0045595 | regulation of cell differentiation                      | 6.73E-78       | 1.90 (21172,1687,4642,703)  |
| GO:0048518 | positive regulation of biological process               | 1.77E-74       | 1.43 (21172,5348,4642,1673) |
| GO:0048522 | positive regulation of cellular process                 | 4.90E-73       | 1.46 (21172,4789,4642,1529) |
| GO:0048513 | animal organ development                                | 3.12E-66       | 1.97 (21172,1281,4642,553)  |
| GO:0007267 | cell-cell signaling                                     | 8.51E-60       | 2.61 (21172,464,4642,266)   |
| GO:0023052 | signaling                                               | 3.20E-59       | 2.47 (21172,547,4642,296)   |
| GO:0051094 | positive regulation of developmental process            | 4.53E-59       | 1.87 (21172,1386,4642,569)  |
| GO:0060284 | regulation of cell development                          | 6.54E-58       | 2.08 (21172,935,4642,426)   |
| GO:0051960 | regulation of nervous system development                | 1.86E-57       | 2.09 (21172,904,4642,415)   |
| GO:0051240 | positive regulation of multicellular organismal process | 2.14E-57       | 1.78 (21172,1633,4642,638)  |

**Enrichment (N, B, n, b)** is defined as follows:

N - is the total number of genes

B - is the total number of genes associated with a specific GO term

n - is the number of genes in the top of the user's input list or in the target set when appropriate

b - is the number of genes in the intersection

Enrichment =  $(b/n) / (B/N)$

**Supplementary Table 11**

**Regulatory features in the PRC2-bound silencers.**

|                                                 | <b>Features</b> | <b>log2 Fold Enrichment</b> | <b>Z score (1000X simulation)</b> |
|-------------------------------------------------|-----------------|-----------------------------|-----------------------------------|
| <b>Ensembl Regulatory Build (PMID:25887522)</b> | Open chromatin  | 1.05                        | 11.58                             |
|                                                 | TF binding      | 1.06                        | 5.68                              |
|                                                 | Enhancer        | -1.76                       | -6.86                             |
| <b>TF binding (PMID:18555785)</b>               | n-Myc           | 4.4                         | 26.05                             |
|                                                 | Smad1           | 4                           | 14.68                             |
|                                                 | ZFX             | 3.8                         | 26.32                             |
|                                                 | Pou5f1          | 3.6                         | 17.9                              |
|                                                 | Klf4            | 3.5                         | 25.7                              |
|                                                 | c-Myc           | 3.5                         | 8.54                              |
|                                                 | Esrrb           | 3.4                         | 37.51                             |
|                                                 | Tcfcp2l1        | 3.2                         | 33.65                             |
|                                                 | STAT3           | 3.1                         | 10.27                             |
|                                                 | Sox2            | 3                           | 14.23                             |
|                                                 | E2F1            | 2.8                         | 17.1                              |
| CTCF                                            | 2.6             | 28.21                       |                                   |
| Nanog                                           | 2.5             | 14.74                       |                                   |
| <b>Sequence composition</b>                     | CGI             | 6.8                         | 176.37                            |

Enrichment of open chromatin, transcription factor binding sites and CpG islands were assessed in the PRC2-bound silencers.
